# Supplementary material
Source: PubMed Central journal article supplement (PMC2874685)
Supplement: NIHMS197198-supplement-01.pdf [file NIHMS197198-supplement-01.pdf]

Supplemental Information

**Transcription Factor Nrf1 Mediates the Proteasome Recovery Pathway after Proteasome Inhibition in Mammalian Cells**

**Senthil K. Radhakrishnan, Candy S. Lee, Patrick Young, Anne Beskow, Jefferson Y. Chan, and Raymond J. Deshaies**

**Table S1**

The following human-specific primers were used for quantitative RT-PCR experiments.

| Gene          | Forward Primer                | Reverse Primer                |
|---------------|-------------------------------|-------------------------------|
| <i>PSMA7</i>  | 5'-CTGTGCTTTGGATGACAACG-3'    | 5'-CGATGTAGCGGGTGATGTACT-3'   |
| <i>PSMB4</i>  | 5'-CTCGTTTCCGCAACATCTCT-3'    | 5'-TGTCCATCTCCCAGAAGCTC-3'    |
| <i>PSMB7</i>  | 5'-TGCAAAGAGGGGATACAAGC-3'    | 5'-GCAACAACCATCCCTTCAGT-3'    |
| <i>PSMC1</i>  | 5'-TTCCGAGTTGCTGAAGAACA-3'    | 5'-ATCCATCCAACCTGGTTCAGC-3'   |
| <i>PSMC4</i>  | 5'-GGAAGACCATGTTGGCAAAG-3'    | 5'-AAGATGATGGCAGGTGCATT-3'    |
| <i>PSMD1</i>  | 5'-GGGGACCTCTTCAATGTCAA-3'    | 5'-GCCTTCCAATCTCTGGTCAA-3'    |
| <i>PSMD12</i> | 5'-GTGCGCGACTGACTAAAACA-3'    | 5'-TAGGCAGAGCCTCATTGCT-3'     |
| <i>NQO1</i>   | 5'-AGCCAGATATTGTGGCTGA-3'     | 5'-CGGAAGGGTCCTTTGTCATA-3'    |
| <i>GAPDH</i>  | 5'-GGTGGTCTCCTCTGACTTCAACA-3' | 5'-GTTGCTGTAGCCAAATTCGTTGT-3' |

**Table S2**

The following mouse-specific primers were used for quantitative RT-PCR experiments.

| Gene          | Forward Primer              | Reverse Primer             |
|---------------|-----------------------------|----------------------------|
| <i>PSMA7</i>  | 5'-AACGTCTGTATGGCCTTTGC-3'  | 5'-GTCACTGGGTCTCCACTGT-3'  |
| <i>PSMB4</i>  | 5'-TTCAGTGGCCACTGGTTATG-3'  | 5'-CGAACGGGCATCTCTGTAGT-3' |
| <i>PSMB7</i>  | 5'-CTGTCTTGGAAGCGGATTTTC-3' | 5'-GCAACAACCATCCCTTCAGT-3' |
| <i>PSMC1</i>  | 5'-AAGGGGGTCATTCTCTACGG-3'  | 5'-AAGCTCTGAGCCAACCACTC-3' |
| <i>PSMC4</i>  | 5'-TGGTCATCGGTCAGTTCTTG-3'  | 5'-CGGTCGATGGTACTCAGGAT-3' |
| <i>PSMD1</i>  | 5'-GGGGCTTTTGAGGAGTCTCT-3'  | 5'-GCAAATCTGCATTTTCCACA-3' |
| <i>PSMD12</i> | 5'-TCACAGACCTGCCAGTCAAG-3'  | 5'-AGGTTTTAGTCAGCCGAGCA-3' |
| <i>GAPDH</i>  | 5'-AACTTTGGCATTGTGGAAGG-3'  | 5'-GGATGCAGGGATGATGTTCT-3' |
